# Supplementary material for: Improved Sensitivity in Hydrophilic Interaction Liquid Chromatography-Electrospray-Mass Spectrometry after Removal of Sodium and Potassium Ions from Biological Samples
Source: MDPI journal article supplement (doi:10.3390/metabo11030170), 2021-03-15
Supplement: s1 [file s1]

# Supplementary information - Improved sensitivity in hydrophilic interaction liquid chromatography-electrospray-mass spectrometry after removal of sodium and potassium ions from biological samples

## Contents:

- Table S1 – Summary of the selected analytes in the standard solutions
- Table S2 – Summary of selected analytes in plasma that was investigated
- Table S3 – Summary of selected analytes in the cells samples that was investigated
- Table S4- Summary of results from evaluating protein precipitation prior to SPE
- Figure S1 – Summary of results where each elution fraction from plasma samples were collected separately and analyzed
- Table S5- Summary of all annotated features with higher intensity in SPE MCX
- Table S6 – Summary of all annotated features with higher intensity in PPT

Table S 1. Selected analytes in the standard solutions for screening of solid phases

| <i>Analyte</i>                       | <i>Elemental composition</i>                                                  | <i>Mw</i> | <i>Log p (XlogP3)</i> | <i>pKa (acidic)</i>  | <i>pKa (basic)</i> | <i>Retention time (min)</i> |
|--------------------------------------|-------------------------------------------------------------------------------|-----------|-----------------------|----------------------|--------------------|-----------------------------|
| <i>Adenine</i>                       | C <sub>5</sub> H <sub>5</sub> N <sub>5</sub>                                  | 135.13    | -0.1                  | 10.29                | 3.64               | 3.51                        |
| <i>Hypoxanthine</i>                  | C <sub>5</sub> H <sub>4</sub> N <sub>4</sub> O                                | 136.11    | -0.5                  |                      |                    | 3.52                        |
| <i>Choline</i>                       | C <sub>5</sub> H <sub>14</sub> NO <sup>+</sup>                                | 104.17    | -0.4                  | 13.97                |                    | 4.99                        |
| <i>Butyrylcarnitine</i>              | C <sub>11</sub> H <sub>21</sub> NO <sub>4</sub>                               | 231.29    | 1.2                   | 4.27                 |                    | 8.38                        |
| <i>Betaine</i>                       | C <sub>5</sub> H <sub>11</sub> NO <sub>2</sub>                                | 117.15    | 0.5                   | 2.26                 |                    | 8.82                        |
| <i>Phenylalanine [F]<sup>2</sup></i> | C <sub>9</sub> H <sub>11</sub> NO <sub>2</sub>                                | 165.19    | -1.5                  | 2.47                 | 9.45               | 9.05                        |
| <i>Tryptophan [F]<sup>2</sup></i>    | C <sub>11</sub> H <sub>12</sub> N <sub>2</sub> O <sub>2</sub>                 | 204.22    | -1.1                  | 2.54                 | 9.4                | 9.14                        |
| <i>Thiamine [F]<sup>2</sup></i>      | C <sup>12</sup> H <sub>17</sub> N <sub>4</sub> OS <sup>+</sup>                | 265.36    | 1                     |                      | 5.54               | 9.21                        |
| <i>Acetylcarnitine</i>               | C <sub>9</sub> H <sub>17</sub> NO <sub>4</sub>                                | 203.24    | 0.4                   | 4.09                 |                    | 9.68                        |
| <i>Proline</i>                       | C <sub>5</sub> H <sub>9</sub> NO <sub>2</sub>                                 | 115.13    | -2.5                  | 1.94                 | 11.33              | 9.79                        |
| <i>Taurine</i>                       | C <sub>2</sub> H <sub>7</sub> NO <sub>3</sub> S                               | 125.15    | -4.1                  | -1.5 (sulfonic acid) | 9.34               | 9.87                        |
| <i>Carnitine</i>                     | C <sub>7</sub> H <sub>15</sub> NO <sub>3</sub>                                | 161.2     | -0.2                  | 4.2                  |                    | 10.46                       |
| <i>Creatine</i>                      | C <sub>4</sub> H <sub>9</sub> N <sub>3</sub> O <sub>2</sub>                   | 131.13    | -1.2                  | 3.5                  | 12.43              | 10.68                       |
| <i>Arginine</i>                      | C <sub>6</sub> H <sub>14</sub> N <sub>4</sub> O <sub>2</sub>                  | 174.20    | -4.2                  | 2.41                 | 12.41              | 12.28                       |
| <i>NADH</i>                          | C <sub>21</sub> H <sub>29</sub> N <sub>7</sub> O <sub>14</sub> P <sub>2</sub> | 665.4     | -5.7                  | 1.85                 | 4.01               | 12.37                       |

Table S2. Summary of the selected analytes that was investigate din the plasma

|                             | <i>Elemental composition</i>                                  | <i>Mw</i> | <i>Log p (XlogP3)</i> | <i>pKa (acidic)</i>  | <i>pKa (basic)</i> | <i>Retention time (min)</i> |
|-----------------------------|---------------------------------------------------------------|-----------|-----------------------|----------------------|--------------------|-----------------------------|
| <i>Caffeine</i>             | C <sub>8</sub> H <sub>10</sub> N <sub>4</sub> O <sub>2</sub>  | 194.19    | -0.1                  |                      |                    | 0.86                        |
| <i>Theophylline</i>         | C <sub>7</sub> H <sub>8</sub> N <sub>4</sub> O <sub>2</sub>   | 180.16    | 0                     |                      |                    | 1.08                        |
| <i>Hypoxanthine</i>         | C <sub>5</sub> H <sub>4</sub> N <sub>4</sub> O                | 136.11    | -0.5                  |                      |                    | 3.52                        |
| <i>Creatinine</i>           | C <sub>4</sub> H <sub>7</sub> N <sub>3</sub> O                | 113.12    | -1.8                  | 9.21                 | 4.96               | 3.65                        |
| <i>Palmitoylcarnitine</i>   | C <sub>23</sub> H <sub>45</sub> NO <sub>4</sub>               | 399.60    | 7.7                   | 4.22                 |                    | 4.46                        |
| <i>Choline</i>              | C <sub>5</sub> H <sub>14</sub> NO <sup>+</sup>                | 104.17    | -0.4                  | 13.97                |                    | 4.99                        |
| <i>Pantothenic acid</i>     | C <sub>9</sub> H <sub>17</sub> NO <sub>5</sub>                | 219.23    | -1.1                  | 4.35                 |                    | 6.09                        |
| <i>1-methylnicotinamide</i> | C <sub>7</sub> H <sub>9</sub> N <sub>2</sub> O <sup>+</sup>   | 137.16    | -0.1                  | 12.24                |                    | 7.12                        |
| <i>Hexanoylcarnitine</i>    | C <sub>13</sub> H <sub>25</sub> NO <sub>4</sub>               | 259.34    | 2.3                   | 4.22                 |                    | 7.14                        |
| <i>Valerylcarnitine</i>     | C <sub>12</sub> H <sub>23</sub> NO <sub>4</sub>               | 245.32    | 1.8                   | 4.34                 |                    | 7.73                        |
| <i>Oxoproline</i>           | C <sub>5</sub> H <sub>7</sub> NO <sub>3</sub>                 | 129.11    | -0.8                  | 3.61                 |                    | 8.29                        |
| <i>Butyrylcarnitine</i>     | C <sub>11</sub> H <sub>21</sub> NO <sub>4</sub>               | 231.29    | 1.2                   | 4.27                 |                    | 8.38                        |
| <i>Homostachydrine</i>      | C <sub>8</sub> H <sub>15</sub> NO <sub>2</sub>                | 157.21    | 1.4                   | 2.39                 |                    | 8.48                        |
| <i>Prolinebetaine</i>       | C <sub>7</sub> H <sub>13</sub> NO <sub>2</sub>                | 142.18    | 1                     | 2.26                 |                    | 8.76                        |
| <i>Betaine</i>              | C <sub>5</sub> H <sub>11</sub> NO <sub>2</sub>                | 117.15    | 0.5                   | 2.26                 |                    | 8.82                        |
| <i>Propionylcarnitine</i>   | C <sub>10</sub> H <sub>19</sub> NO <sub>4</sub>               | 217.26    | 0.9                   | 4.19                 |                    | 9.02                        |
| <i>Phenylalanine</i>        | C <sub>9</sub> H <sub>11</sub> NO <sub>2</sub>                | 165.19    | -1.5                  | 2.47                 | 9.45               | 9.05                        |
| <i>Leucine</i>              | C <sub>6</sub> H <sub>13</sub> NO <sub>2</sub>                | 131.17    | -1.5                  | 2.79                 | 9.52               | 9.10                        |
| <i>Tryptophan</i>           | C <sub>11</sub> H <sub>12</sub> N <sub>2</sub> O <sub>2</sub> | 204.22    | -1.1                  | 2.54                 | 9.4                | 9.14                        |
| <i>Isoleucine</i>           | C <sub>6</sub> H <sub>13</sub> NO <sub>2</sub>                | 131.17    | -1.7                  | 2.79                 | 9.59               | 9.36                        |
| <i>Acetylcarnitine</i>      | C <sub>9</sub> H <sub>17</sub> NO <sub>4</sub>                | 203.24    | 0.4                   | 4.09                 |                    | 9.68                        |
| <i>Proline</i>              | C <sub>5</sub> H <sub>9</sub> NO <sub>2</sub>                 | 115.13    | -2.5                  | 1.94                 | 11.33              | 9.79                        |
| <i>Taurine</i>              | C <sub>2</sub> H <sub>7</sub> NO <sub>3</sub> S               | 125.15    | -4.1                  | -1.5 (sulfonic acid) | 9.34               | 9.87                        |
| <i>Tyrosine</i>             | C <sub>9</sub> H <sub>11</sub> NO <sub>3</sub>                | 181.19    | -2.3                  | 2                    | 9.19               | 10.01                       |
| <i>3-Dehydroxycarnitine</i> | C <sub>7</sub> H <sub>15</sub> NO <sub>2</sub>                | 145.20    | 0.8                   | 4.46                 |                    | 10.38                       |
| <i>L-carnitine</i>          | C <sub>7</sub> H <sub>15</sub> NO <sub>3</sub>                | 161.2     | -0.2                  | 4.2                  |                    | 10.46                       |
| <i>Creatine</i>             | C <sub>4</sub> H <sub>9</sub> N <sub>3</sub> O <sub>2</sub>   | 131.13    | -1.2                  | 3.5                  | 12.43              | 10.68                       |
| <i>Arginine</i>             | C <sub>6</sub> H <sub>14</sub> N <sub>4</sub> O <sub>2</sub>  | 174.20    | -4.2                  | 2.41                 | 12.41              | 12.28                       |

Table S3. Summary of the selected analytes that was investigate in the cells samples.

|                              | <i>Elemental composition</i>                                               | <i>Mw</i> | <i>Log p (XlogP3)</i> | <i>pKa (acidic)</i>  | <i>pKa (basic)</i> | <i>Retention time (min)</i> |
|------------------------------|----------------------------------------------------------------------------|-----------|-----------------------|----------------------|--------------------|-----------------------------|
| <i>Niacinamide</i>           | C <sub>6</sub> H <sub>6</sub> N <sub>2</sub> O                             | 122.12    | -0.4                  |                      |                    | 1.05                        |
| <i>Adenine</i>               | C <sub>5</sub> H <sub>5</sub> N <sub>5</sub>                               | 135.13    | -0.1                  | 10.29                | 3.64               | 3.51                        |
| <i>Hypoxanthine</i>          | C <sub>5</sub> H <sub>4</sub> N <sub>4</sub> O                             | 136.11    | -0.5                  |                      |                    | 3.52                        |
| <i>Choline</i>               | C <sub>5</sub> H <sub>14</sub> NO <sup>+</sup>                             | 104.17    | -0.4                  | 13.97                |                    | 4.99                        |
| <i>Pantothenic acid</i>      | C <sub>9</sub> H <sub>17</sub> NO <sub>5</sub>                             | 219.23    | -1.1                  | 4.35                 |                    | 6.09                        |
| <i>Inosine</i>               | C <sub>10</sub> H <sub>12</sub> N <sub>4</sub> O <sub>5</sub>              | 268.23    | -1.3                  | 6.94                 |                    | 6.94                        |
| <i>1-methylnicotinamide</i>  | C <sub>7</sub> H <sub>9</sub> N <sub>2</sub> O <sup>+</sup>                | 137.16    | -0.1                  | 12.24                |                    | 7.12                        |
| <i>Hexanoylcarnitine</i>     | C <sub>13</sub> H <sub>25</sub> NO <sub>4</sub>                            | 259.34    | 2.3                   | 4.22                 |                    | 7.14                        |
| <i>Guanine</i>               | C <sub>5</sub> H <sub>5</sub> N <sub>5</sub> O                             | 151.13    | -1.1                  | 8.95                 |                    | 7.91                        |
| <i>Betaine</i>               | C <sub>5</sub> H <sub>11</sub> NO <sub>2</sub>                             | 117.15    | 0.5                   | 2.26                 |                    | 8.82                        |
| <i>Isoleucine</i>            | C <sub>6</sub> H <sub>13</sub> NO <sub>2</sub>                             | 131.17    | -1.7                  | 2.79                 | 9.59               | 9.36                        |
| <i>Methyl-deoxyguanosine</i> | C <sub>11</sub> H <sub>16</sub> N <sub>5</sub> O <sub>4</sub> <sup>+</sup> | 282.28    | -1.6                  |                      |                    | 9.83                        |
| <i>Acetylcarnitine</i>       | C <sub>9</sub> H <sub>17</sub> NO <sub>4</sub>                             | 203.24    | 0.4                   | 4.09                 |                    | 9.68                        |
| <i>Proline</i>               | C <sub>5</sub> H <sub>9</sub> NO <sub>2</sub>                              | 115.13    | -2.5                  | 1.94                 | 11.33              | 9.79                        |
| <i>Taurine</i>               | C <sub>2</sub> H <sub>7</sub> NO <sub>3</sub> S                            | 125.15    | -4.1                  | -1.5 (sulfonic acid) | 9.34               | 9.87                        |
| <i>Arginine</i>              | C <sub>6</sub> H <sub>14</sub> N <sub>4</sub> O <sub>2</sub>               | 174.20    | -4.2                  | 2.41                 | 12.41              | 12.28                       |

Table S6. Summary of relative peak area<sup>1</sup> and CV (%) of the investigated analytes in the experiment where protein precipitation prior to SPE MCX was evaluated.

| Analyte, retention time (min)  | MCX with PPT           |        | MCX without PPT        |        | PPT      |
|--------------------------------|------------------------|--------|------------------------|--------|----------|
|                                | Relative intensity (%) | CV (%) | Relative intensity (%) | CV (%) | CV (%)   |
| Hypoxanthine 4.02              | 125.6266472            | 1.378  | 110.8799044            | 3.441  | 21.952   |
| Creatinine 4.2                 | 117.4299843            | 2.12   | 133.807133             | 3.485  | 4.744489 |
| Palmitoylcarnitine 5.4         | 85.9602697             | 26.69  | 33.40121224            | 21.08  | 29.53563 |
| Choline 5.56                   | 2.641500251            | 19.27  | 16.61154504            | 7.061  | 26.21871 |
| Pantothenic acid 6.84          | 85.40492916            | 8.207  | 80.93837492            | 5.336  | 5.590506 |
| 2-methylbutyroylcarnitine 8.27 | 149.3165296            | 6.293  | 125.317237             | 8.285  | 5.853454 |
| Oxoproline 8.76                | 228.2463995            | 2.677  | 115.1336233            | 20.12  | 6.768046 |
| Butyrylcarnitine 8.8           | 326.7776176            | 6.254  | 304.829507             | 11.39  | 4.878658 |
| Homostachydrine 8.93           | 115.729242             | 3.322  | 176.7540209            | 8.003  | 5.886134 |
| Proline betaine 9.21           | 116.14128              | 1.941  | 208.7181999            | 7.591  | 2.874121 |
| Thiamine 9.22                  | 220.2583361            | 4.059  | 108.0585633            | 27.85  | 6.794585 |
| Betaine 9.28                   | 119.4600827            | 5.5    | 212.8528293            | 7.144  | 2.439191 |
| Propionylcarnitine 9.39        | 293.6652519            | 10.91  | 278.6311758            | 6.534  | 3.088455 |
| Phenylalanine 9.48             | 126.6451497            | 3.006  | 77.60832642            | 23.57  | 2.433404 |
| Tryptophan 9.49                | 106.2957566            | 1.798  | 41.48744984            | 25.86  | 2.930751 |
| Methylnicotinamide 9.69        | 0.400363315            | 173.2  | 0.171527667            | 173.2  | 3.714952 |
| Methylnicotinic acid 9.69      | 147.4394847            | 4.138  | 257.7782455            | 14.2   | 3.328579 |
| Acetylcarnitine 10.05          | 811.7125802            | 9.421  | 819.0594752            | 7.589  | 4.143839 |
| Proline 10.11                  | 233.2310097            | 5.982  | 320.609619             | 19.61  | 6.45092  |
| Taurine 10.14                  | 284.1782996            | 14.46  | 339.3882756            | 23.99  | 15.05482 |
| Acetylcholine 10.62            | 997.3195326            | 10.29  | 718.4421449            | 6.944  | 10.72659 |
| Carnitine 10.69                | 304.2582519            | 4.811  | 363.3005072            | 8.104  | 9.008662 |
| Creatine 10.88                 | 165.4677771            | 15.47  | 195.2015767            | 35.94  | 7.764325 |
| Glycerophosphocholine 11.41    | 479.1616469            | 53.13  | 1303.867205            | 39.53  | 28.20472 |
| Leucine 9.57                   | 126.7773962            | 8.391  | 102.2020429            | 23.35  | 5.597462 |
| Isoleucine 9.78 <sup>3</sup>   | ∞                      | 20.14  | ∞                      | 23.76  | 0        |
| Sodium Na <sup>+</sup>         | 4.648797421            | 26.54  | 12.70694818            | 19.66  | 1.758547 |

<sup>1</sup> mean of SPE replicates/mean of PPT replicates expressed as percent (%)

<sup>2</sup>The analyte was detected as a fragment

<sup>3</sup>Isoleucine was only detected in SPE MCX

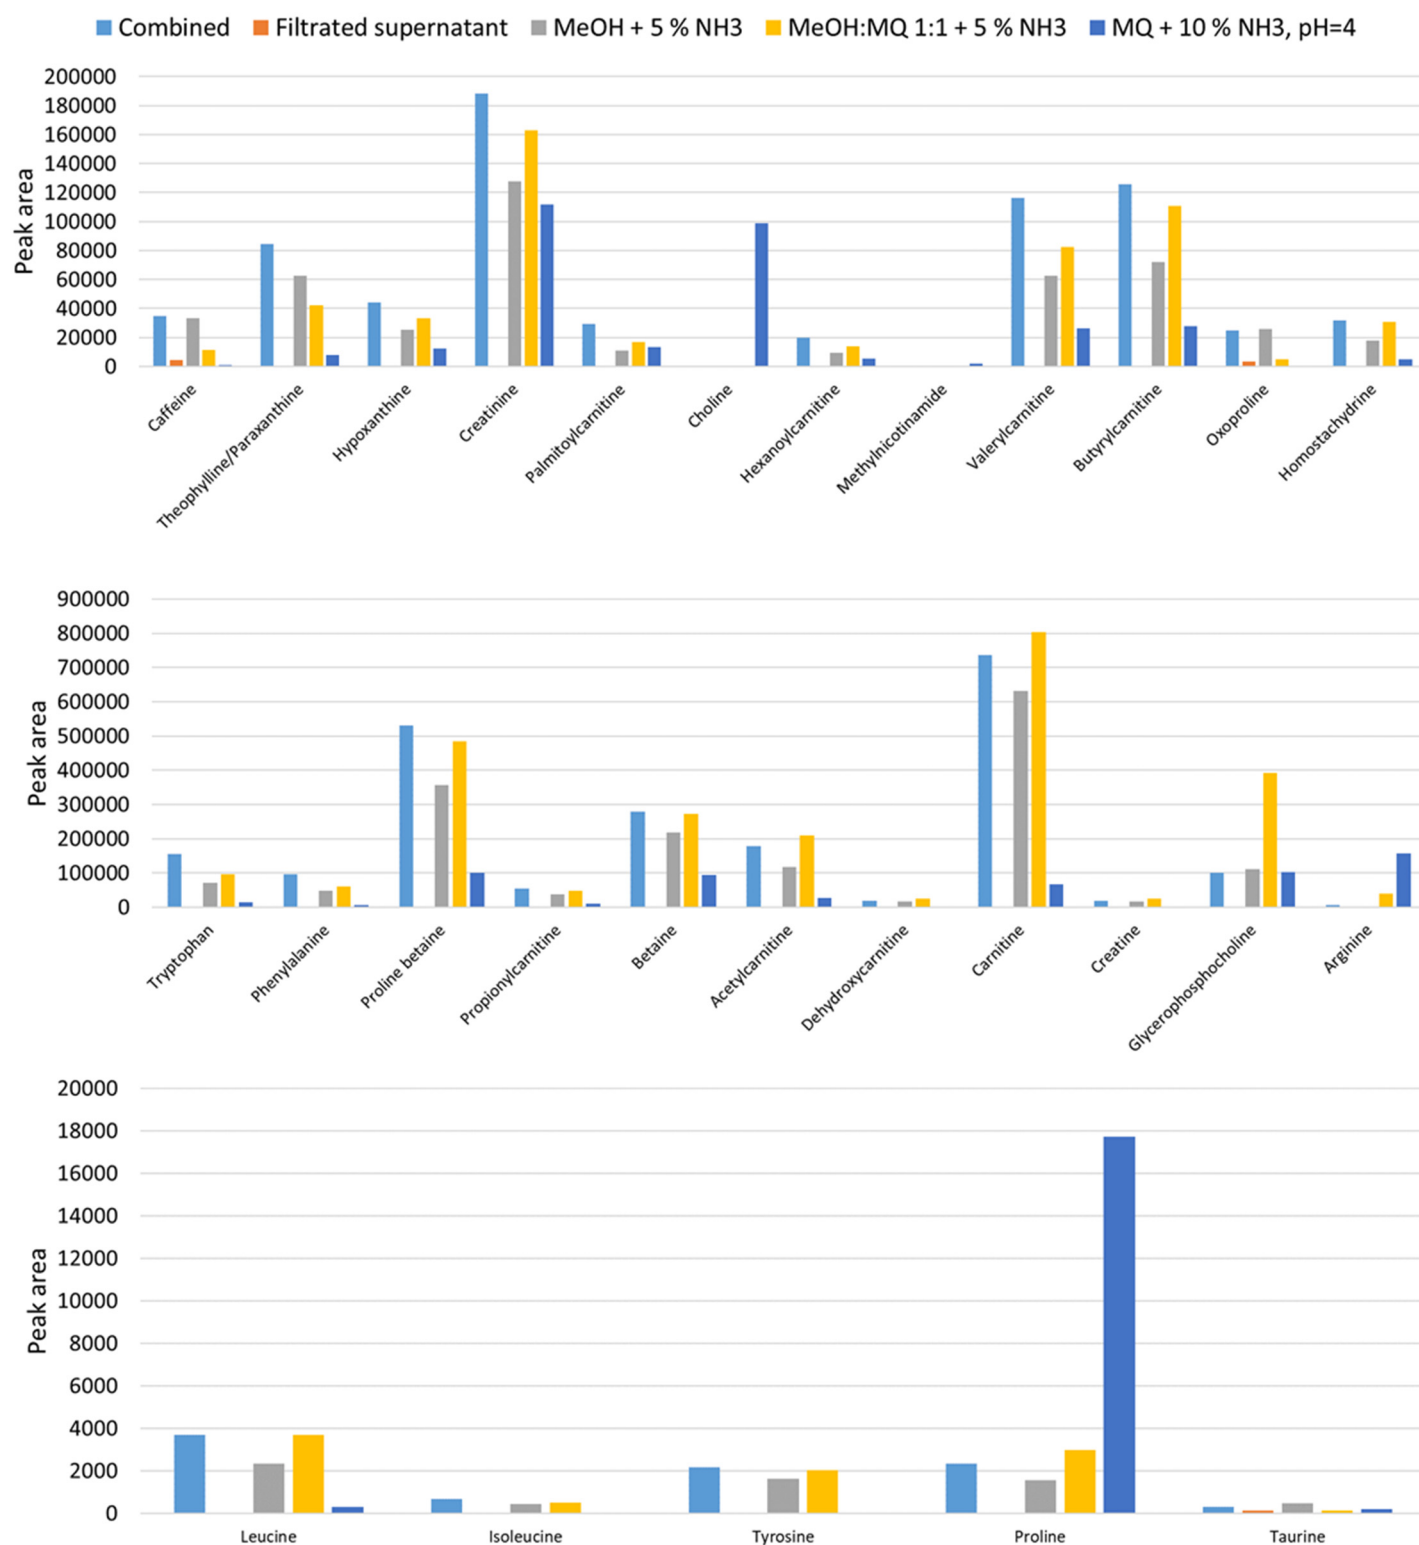

Figure S1. Summary of results for the plasma samples where the filtered supernatant and three different elution fractions were collected separately.

Table S7. Annotated features from the OPLS-DA analysis found in higher intensity in the SPE MCX

| Analyte            | Adducts                | <i>m/z</i> | Retention (min) |
|--------------------|------------------------|------------|-----------------|
| PEG 12             | [M+K] isotope          | 586.292    | 1.68            |
|                    | [M+Na]                 | 569.315    | 1.68            |
| PEG 13             | [M+Na]                 | 613.341    | 1.76            |
| Creatinine         | [M+H]                  | 114.067    | 3.65            |
|                    | [F]                    | 86.071     | 3.65            |
| Palmitoylcarnitine | [M+H]                  | 400.344    | 4.46            |
| Hexanoylcarnitine  | [M+H]                  | 260.186    | 7.14            |
| Valerylcarnitine   | [F]                    | 85.0283    | 7.74            |
|                    | [M+H] isotope          | 247.173    | 7.73            |
| Oxoproline         | [M+H]                  | 130.05     | 8.29            |
| Butyrylcarnitine   | [M+H]                  | 232.153    | 8.38            |
|                    | [F]                    | 173.081    | 8.38            |
|                    | [F]                    | 85.0283    | 8.38            |
| Gly Pro Pro Ala*   | [M+2Na-H]              | 385.145    | 8.44            |
|                    | [M+H]                  | 341.181    | 8.44            |
|                    | [M+H-H <sub>2</sub> O] | 323.17     | 8.45            |
|                    | [M+K]                  | 379.137    | 8.44            |
|                    | [M+Na]                 | 363.163    | 8.44            |
|                    | [M+NH <sub>4</sub> ]   | 358.207    | 8.44            |
| Homostachydrine    | [M+H]                  | 158.118    | 8.49            |
| Pro Pro Ala Thr*   | [M+H]                  | 385.207    | 8.51            |
|                    | [M+2Na-H]              | 429.171    | 8.51            |
|                    | [M+Na]                 | 407.19     | 8.51            |
|                    | [M+K]                  | 423.163    | 8.51            |
|                    | [M+NH <sub>4</sub> ]   | 402.234    | 8.51            |
| Ile Pro Ala Glu*   | [M+2Na-H]              | 473.198    | 8.57            |
|                    | [M+H]                  | 429.233    | 8.57            |
|                    | [M+K]                  | 467.189    | 8.57            |
|                    | [M+Na]                 | 451.216    | 8.57            |
|                    | [M+NH <sub>4</sub> ]   | 446.26     | 8.57            |
| His Ala Val Phe*   | [M+H]                  | 473.259    | 8.62            |
|                    | [M+2Na-H]              | 517.224    | 8.62            |
|                    | [M+K]                  | 511.215    | 8.61            |
|                    | [M+Na]                 | 495.242    | 8.62            |
|                    | [M+NH <sub>4</sub> ]   | 490.286    | 8.61            |
| Histidinyproline   | [M+2Na-H]              | 297.093    | 8.65            |
|                    | [M+K]                  | 291.084    | 8.65            |

|                                          |                         |         |      |
|------------------------------------------|-------------------------|---------|------|
|                                          | [M+Na]                  | 275.111 | 8.65 |
|                                          | [M+Na+K-H]              | 313.066 | 8.65 |
| Norleucine/Alloisoleucine/Alaninebetaine | [M+H]                   | 132.102 | 8.70 |
| N-(1-Deoxy-1-fructosyl)valine            | [M+H]                   | 280.14  | 8.73 |
|                                          | [M+H-2H <sub>2</sub> O] | 244.119 | 8.73 |
|                                          | [M+H-H <sub>2</sub> O]  | 262.13  | 8.73 |
|                                          | [M+Na]                  | 302.122 | 8.73 |
| Proline betaine                          | [M+H]                   | 144.103 | 8.76 |
|                                          | [M+Na]                  | 166.084 | 8.76 |
| Betaine                                  | [M+H]                   | 118.087 | 8.82 |
|                                          | [2M+Na]                 | 257.148 | 8.81 |
|                                          | [F]                     | 58.0649 | 8.81 |
|                                          | [F]                     | 59.0726 | 8.82 |
|                                          | [M+Na]                  | 140.069 | 8.82 |
| Propionylcarnitine                       | [M+H]                   | 218.139 | 9.03 |
|                                          | [F]                     | 60.0805 | 9.03 |
|                                          | [F]                     | 85.0283 | 9.03 |
|                                          | [F]                     | 159.065 | 9.03 |
| Ile Ile Phe Arg*                         | [M+2Na-H]               | 592.322 | 9.05 |
|                                          | [M+Na]                  | 570.341 | 9.07 |
| Phenylalanine                            | [M+H]                   | 166.086 | 9.05 |
|                                          | [F]                     | 120.081 | 9.05 |
|                                          | [F]                     | 149.06  | 9.05 |
|                                          | [F]                     | 77.0385 | 9.06 |
|                                          | [F]                     | 93.0698 | 9.06 |
|                                          | [F]                     | 103.054 | 9.06 |
|                                          | [F]                     | 107.049 | 9.06 |
| Phenylpropanolamine                      | [M+H]                   | 152.107 | 9.12 |
| Tryptophan                               | [M+H]                   | 205.097 | 9.15 |
|                                          | [F]                     | 118.066 | 9.14 |
|                                          | [F]                     | 91.0542 | 9.14 |
|                                          | [F]                     | 188.071 | 9.14 |
|                                          | [F]                     | 170.06  | 9.14 |
|                                          | [F]                     | 146.061 | 9.14 |
|                                          | [F]                     | 142.065 | 9.14 |
|                                          | [F]                     | 117.058 | 9.14 |
|                                          | [F]                     | 159.092 | 9.14 |
|                                          | [F]                     | 132.081 | 9.15 |
|                                          | [F]                     | 130.065 | 9.15 |
| Methionine                               | [M+2Na-H]               | 194.022 | 9.66 |
| Acetylcarnitine                          | [M+H]                   | 204.124 | 9.69 |
|                                          | [F]                     | 145.05  | 9.69 |
|                                          | [F]                     | 85.0287 | 9.69 |
| Proline                                  | [M+H]                   | 116.071 | 9.80 |



|                      |                  |         |         |
|----------------------|------------------|---------|---------|
|                      | [F]              | 70.065  | 9.80    |
|                      | [M+2Na-H]        | 160.035 | 9.79    |
| Taurine              | [M+2Na-H]        | 169.985 | 9.88    |
| Valine betaine       | [M+H]            | 160.134 | 9.96    |
| Tyrosine             | [M+H]<br>isotope | 183.082 | 10.05   |
|                      | [F]              | 95.0493 | 10.01   |
|                      | [F]              | 91.0542 | 10.01   |
|                      | [F]              | 123.044 | 10.01   |
|                      | [F]              | 119.049 | 10.01   |
|                      | [F]              | 136.076 | 10.01   |
|                      | [F]              | 147.044 | 10.01   |
|                      | [F]              | 165.055 | 10.02   |
| 3-dehydroxycarnitine | [M+Na+K-H]       | 242.017 | 10.0182 |
|                      | [M+H]            | 146.118 | 10.38   |
| Carnitine            | [F]              | 87.044  | 10.38   |
|                      | [M+H]            | 162.114 | 10.47   |
|                      | [F]              | 102.091 | 10.47   |
|                      | [F]              | 60.0807 | 10.47   |
|                      | [F]              | 85.0284 | 10.47   |
|                      | [F]              | 103.039 | 10.47   |
| Creatine             | [M+Na]           | 184.094 | 10.46   |
|                      | [M+H]            | 132.077 | 10.69   |
|                      | [F]              | 90.0549 | 10.69   |
| Threonine            | [M+2Na-H]        | 176.04  | 10.68   |
|                      | [M+2Na-H]        | 164.029 | 10.92   |

\* Exact order of amino acids not determined

Table S8. Annotated features from the OPLS-DA analysis found in higher intensity in the PPT.

| Analyte                  | Adduct                 | <i>m/z</i> | Retention (min) |
|--------------------------|------------------------|------------|-----------------|
| Caffeine                 | [F]                    | 138.066    | 0.86            |
|                          | [M+H]                  | 195.089    | 0.86            |
| Theophylline             | [M+H]                  | 181.073    | 1.10            |
| PEG 6                    | [M+H]                  | 283.176    | 1.19            |
| PEG 5                    | [M+H]                  | 239.149    | 1.24            |
| PEG 7                    | [M+K]                  | 365.158    | 1.37            |
| PEG 10                   | [M+K]                  | 497.236    | 1.38            |
|                          | [M+Na]                 | 481.262    | 1.38            |
| PEG 8                    | [M+K]                  | 409.185    | 1.42            |
|                          | [M+Na]                 | 393.211    | 1.42            |
| PEG 9                    | [M+H]                  | 415.256    | 1.48            |
|                          | [M+K]                  | 453.211    | 1.48            |
|                          | [M+Na]                 | 437.236    | 1.48            |
| PEG 11                   | [M+H]                  | 503.308    | 1.60            |
| PEG 12                   | [M+H]                  | 547.334    | 1.68            |
| Choline                  | [M+]                   | 104.107    | 5.00            |
| Dodecanoylcarnitine      | [M+H]                  | 344.28     | 5.17            |
| Dodecenoylcarnitine      | [M+H]                  | 342.264    | 5.25            |
| Decanoylcarnitine        | [M+H]                  | 318.254    | 5.67            |
| Decenoylcarnitine        | [M+H]                  | 314.233    | 5.81            |
| Decadienoylcarnitine     | [M+H]                  | 312.217    | 6.07            |
| Pantothenic acid         | [M+H]                  | 220.12     | 6.09            |
| Octanoylcarnitine        | [M+H]                  | 288.218    | 6.32            |
|                          | [M+Na]                 | 310.202    | 6.38            |
| Methylnicotinamide       | [M+]                   | 137.072    | 7.12            |
| Hydroxydecanoylcarnitine | [M+H]                  | 332.244    | 7.63            |
| K(HCOOK) <sub>n</sub>    |                        | 542.729    | 7.89            |
|                          |                        | 458.769    | 7.89            |
|                          |                        | 290.847    | 7.89            |
|                          |                        | 206.885    | 7.89            |
|                          |                        | 122.924    | 8.06            |
|                          |                        | 460.767    | 7.89            |
|                          |                        | 292.844    | 7.89            |
|                          |                        | 208.883    | 7.89            |
|                          |                        | 124.923    | 7.89            |
| Hydroxybutyrylcarnitine  | [M+H]                  | 248.15     | 8.39            |
|                          | [M-H <sub>2</sub> O+H] | 230.139    | 8.39            |
| Gly Pro Pro Ala [M+2K-H] | [M+2K-H]               | 417.092    | 8.43            |
|                          | [M+Na+K-H]             | 401.119    | 8.44            |
| Homostachydrine          | [M+K]                  | 196.073    | 8.49            |

|                         |                   |         |       |
|-------------------------|-------------------|---------|-------|
| Pro Pro Ala Thr         | [M+Na+K-H]        | 445.145 | 8.51  |
| Gly His Ile Phe         | [M+Na+K-H]        | 533.197 | 8.61  |
| Betaine                 | [M+K]             | 156.042 | 8.83  |
| Phenylalanine           | [M+Na+K-H]        | 226.024 | 9.05  |
| Leucine                 | [M+2Na-H]         | 176.066 | 9.16  |
| Tryptophan              | [M+2Na-H]         | 249.062 | 9.16  |
| Na(HCOONa) <sub>n</sub> |                   | 770.847 | 9.52  |
|                         |                   | 702.86  | 9.52  |
|                         |                   | 634.874 | 9.52  |
|                         |                   | 566.887 | 9.52  |
|                         |                   | 498.9   | 9.52  |
|                         |                   | 430.913 | 9.52  |
|                         |                   | 362.926 | 9.51  |
|                         |                   | 294.938 | 9.53  |
|                         |                   | 226.952 | 9.52  |
|                         |                   | 158.964 | 9.52  |
|                         |                   | 90.9765 | 9.22  |
|                         |                   | 90.9771 | 9.51  |
|                         |                   | 91.98   | 9.51  |
|                         |                   | 771.85  | 9.52  |
|                         |                   | 703.863 | 9.52  |
|                         |                   | 635.876 | 9.52  |
|                         |                   | 567.89  | 9.52  |
|                         |                   | 499.903 | 9.51  |
|                         |                   | 432.917 | 9.52  |
|                         |                   | 431.916 | 9.52  |
|                         |                   | 364.929 | 9.52  |
|                         |                   | 363.929 | 9.52  |
|                         |                   | 228.955 | 9.52  |
|                         |                   | 227.954 | 9.52  |
|                         |                   | 159.967 | 9.53  |
| Proline                 | [M+2Na-H+2HCOONa] | 296.009 | 9.79  |
|                         | [M+2Na-H+4HCOONa] | 431.982 | 9.79  |
|                         | [M+2Na-H+HCOONa]  | 228.021 | 9.79  |
| Valine                  | [M+2Na-H+4HCOONa] | 433.999 | 9.83  |
|                         | [M+2Na-H+5HCOONa] | 501.986 | 9.84  |
| Tyrosine                | [M+2Na-H+2HCOONa] | 362.019 | 10.01 |
|                         | [2M+4Na-3H]       | 451.988 | 10.02 |
